# Supplementary material
Source: PubMed Central journal article supplement (PMC6219498)
Supplement: 41418_2018_78_MOESM1_ESM.pdf [file 41418_2018_78_MOESM1_ESM.pdf]

Supplementary figure 1

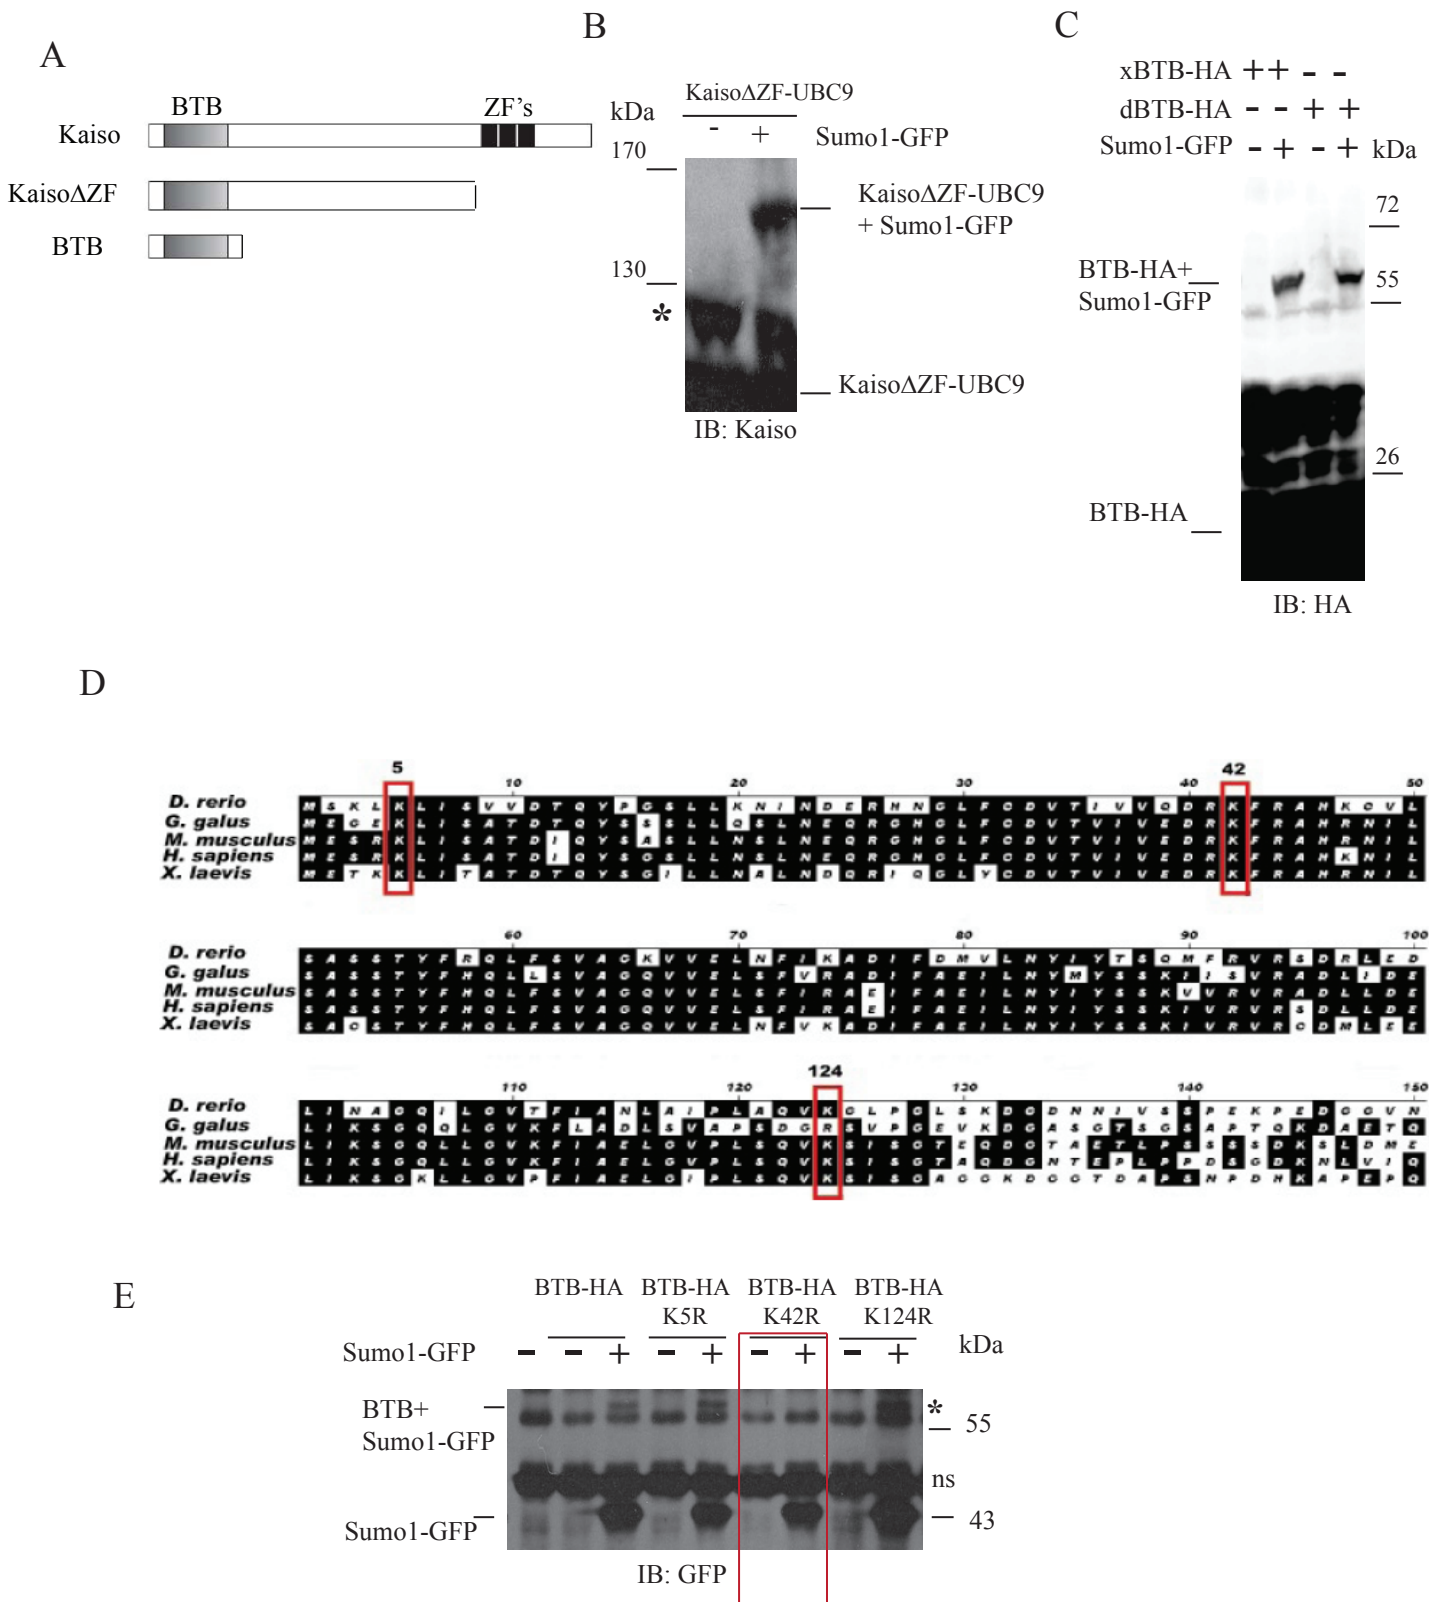

**Supplementary figure 1.** Sumoylation of Kaiso is evolutionary conserved. A, Schematic structure of Kaiso protein and its deletion mutants. B, Hypersumoylation of N-terminal part of Kaiso (1-492aa) that was fused to Ubc9 in presence of exogenous SUMO1-GFP as detected by western blot analysis with Kaiso rabbit pAntibodies. C, expression vectors that code for HA tagged BTB/POZ domain of Kaiso of xenopus (xBTB-HA) or danio rerio (dBTB-HA) origin were cotransfected with or without Sumo1-GFP and western blotted with HA Ab's. D, Alignment of BTB/POZ domains of Kaiso from different species. Most conserved lysines are in red rectangles. E, HA-tagged BTB domains that harbored single amino acid substitutions: K5R, K42R and K124R, were transfected to HEK293 cell line. Western blot of obtained lysates with GFP Ab's revealed sumoylated BTB/POZ domain. Corresponding band is marked with asterisk. Only BTB/POZ domain with K42R mutation cannot be sumoylated.

A

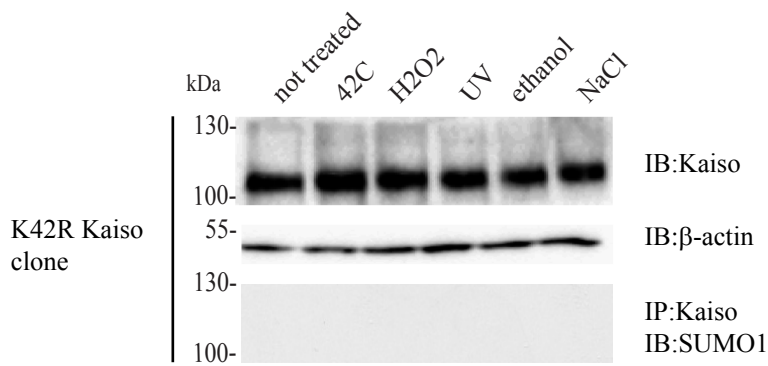

D

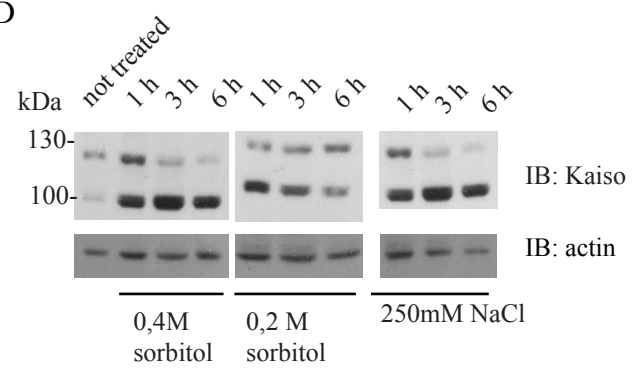

B

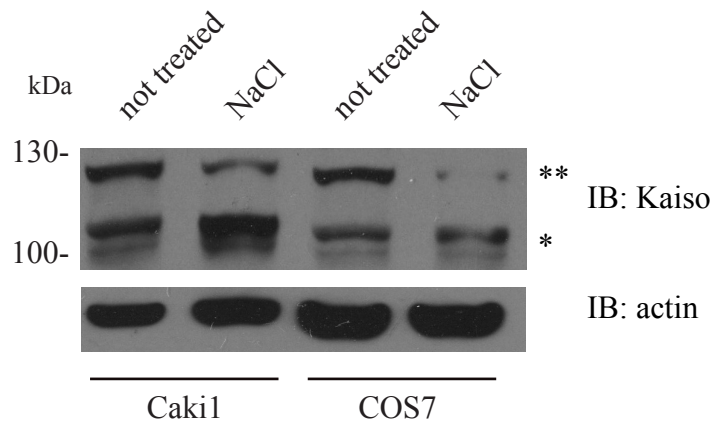

E

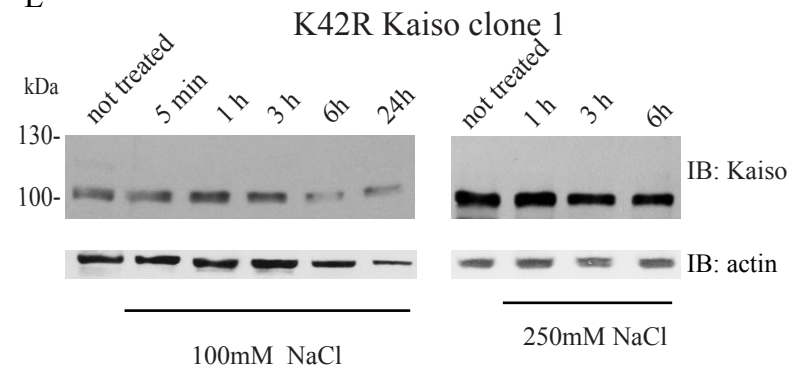

C

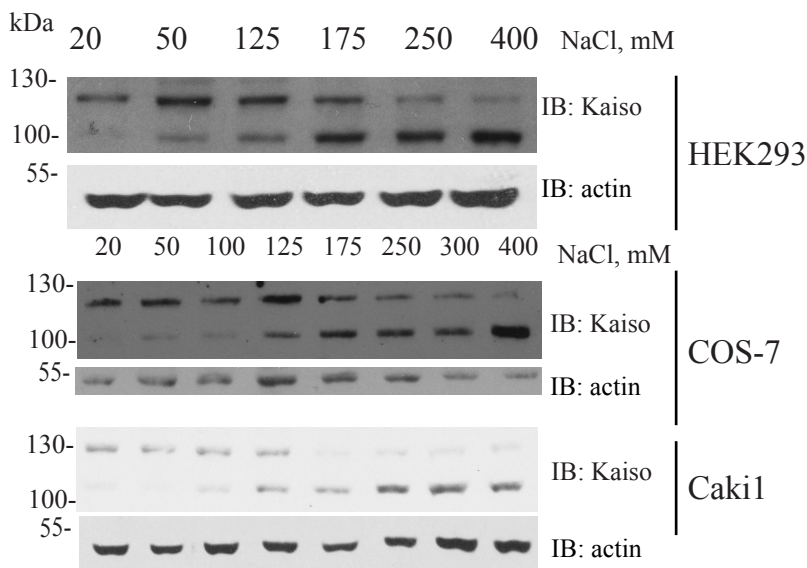

Supplementary figure 2. Hyperosmotic-dependent deSUMOylation of Kaiso. Cells were lysed in loading buffer, analyzed by SDS-PAGE and Western blotting by probing with anti-Kaiso antibodies: A- K42R Kaiso clone 1 was treated as indicated in figure, B- Caki1 and COS7 cells before and after 5min 400mM NaCl addition.

Kaiso is deSUMOylated in both cell lines; \*- nonmodified Kaiso, \*\* - modified Kaiso.

C-HEK293, Caki1, COS7 were incubated with increasing NaCl concentrations 5 minutes, D-time course treatment HEK293 cells with sorbitol during indicated times, E-time course treatment K42R kaiso clone cells with 100mM and 250 mM NaCl during indicated times

A anti Kaiso abs' Alexa488

DAPI +Alexa 488

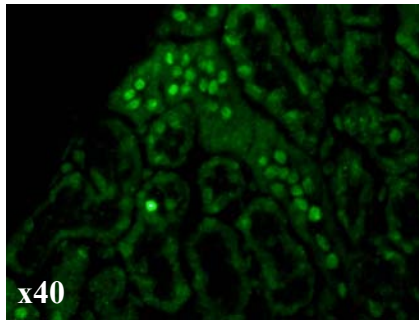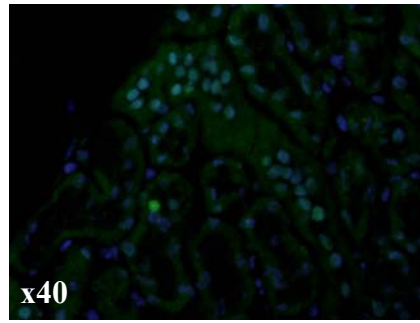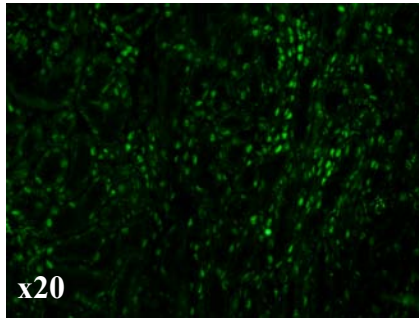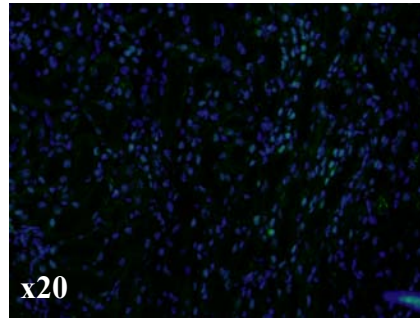

wt  
kidney

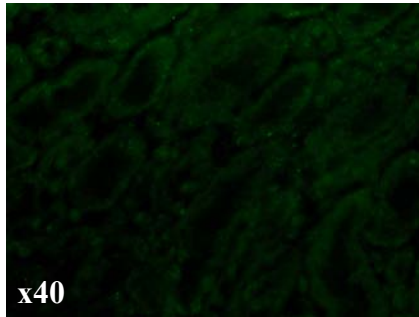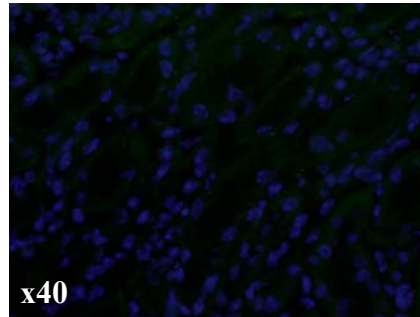

Kaiso KO  
kidney

**Supplementary figure 3** Kaiso expression in mouse kidney (wt and Kaiso KO as a control,) staining with Kaiso rabbit ab's.

normal

+100mM NaCl 24 h

HEK293

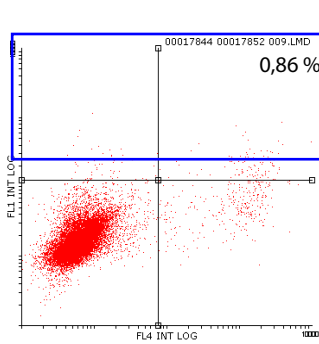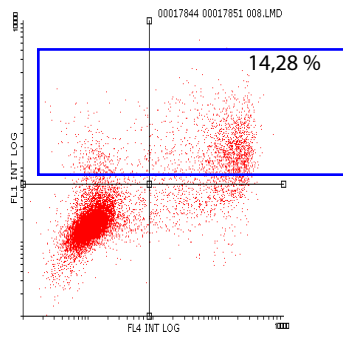

K42R  
clone 1

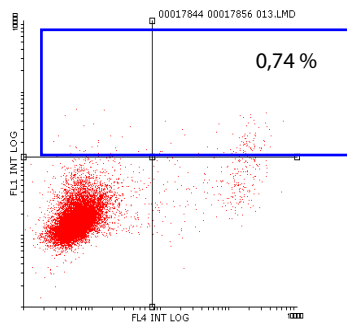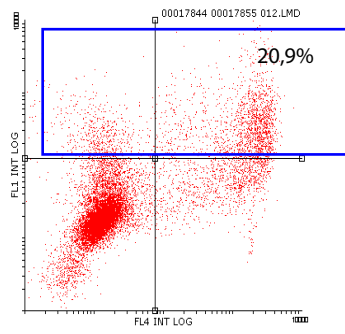

K42R  
clone 2

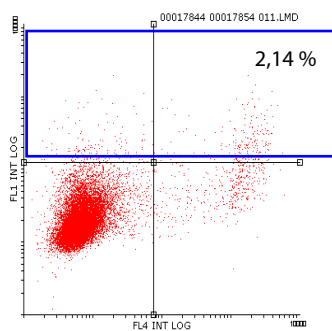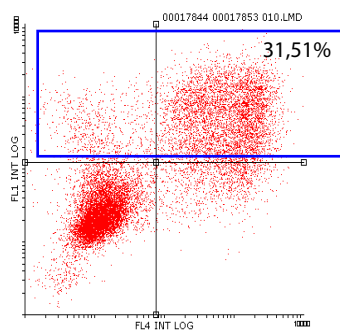

KO clone1  
Kaiso KO  
clone 1

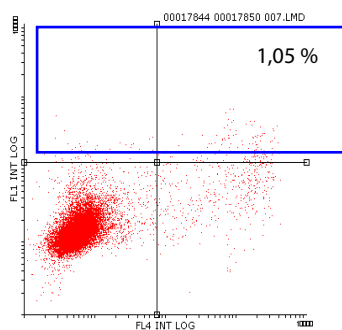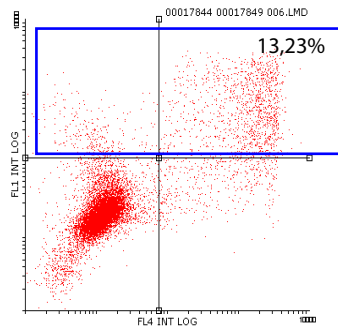

KO clone2

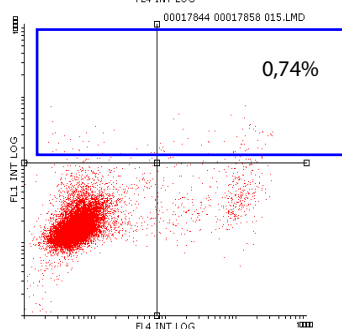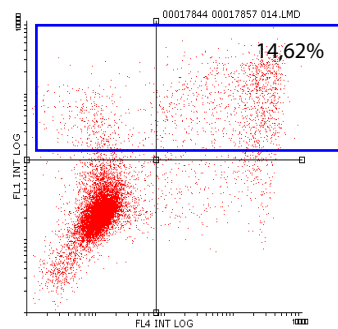

Kaiso KO  
clone 2

Supplementary figure 4. K42R mutant Kaiso predisposed cells to apoptosis after hyperosmotic treatment. Flow cytometry analysis of cells stained with Annexin V -FITC and PI



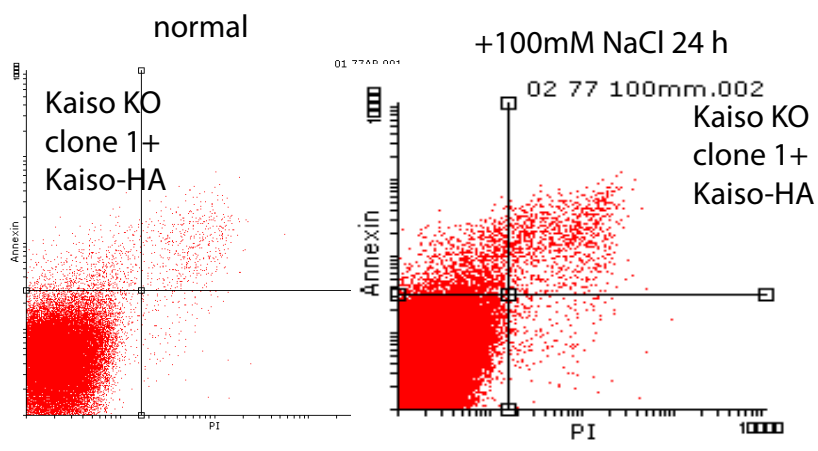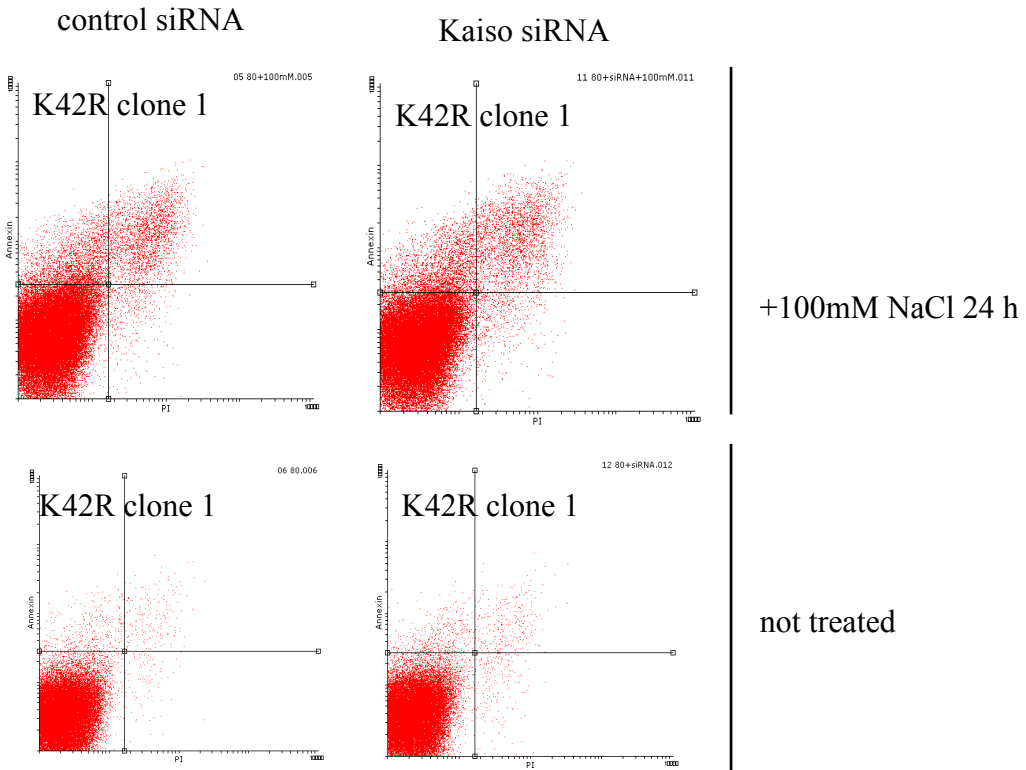

Supplementary figure 5. Analysis of apoptosis in rescue experiments.  
KO transfected with Kaiso-GFP, K42R clones transfected with control or Kaiso siRNA
